# Supplementary material for: Plant and Dairy-Based Yogurts: A Comparison of Consumer Sensory Acceptability Linked to Textural Analysis
Source: MDPI journal article supplement (doi:10.3390/foods11030463), 2022-02-04
Supplement: s1 [file s1]

## Supplementary Material:

**Table S1.** The categorization of yogurts in four categories, which were used for the shortlisting of products for the untrained tasting panels.

| Product Category      | Sub-category          | Brand Name           | Product Name               | Nutritional Info (per 100 g) |                   |                  |                              | Product Code |
|-----------------------|-----------------------|----------------------|----------------------------|------------------------------|-------------------|------------------|------------------------------|--------------|
|                       |                       |                      |                            | Protein (in g)               | Fat, Total (in g) | Calories (in KJ) | Carbohydrates, Sugars (in g) |              |
| Plain Dairy           | Cow                   | Chobani              | Plain whole milk (Greek)   | 8.7                          | 4                 | 366              | 2.7                          | 1*#          |
|                       |                       | Jalna                | organic - pot set          | 4.5                          | 5.4               | 89               | 2.9                          | 2*           |
|                       |                       | Tamar Valley         | Greek style                | 5.3                          | 9.8               | 542              | 5.2                          | 3            |
|                       | Goat                  | Caprilac             | Goat Yoghurt               | 4.2                          | 4.3               | 430              | 6.3                          | 4            |
|                       | Sheep                 | Meredith Dairy       | Sheep Yoghurt              | 6.6                          | 7.1               | 434              | 3.2                          | 5*           |
| Differing Consistency | Spoonable             | Pauls                | Farmhouse Gold - vanilla   | 3.7                          | 5.5               | 469              | 11.7                         | 6            |
|                       |                       | Milk Thief           | Kefir Yoghurt - vanilla    |                              |                   |                  |                              | 7*           |
|                       |                       | Rokeby Farms         | Quark Yoghurt              | 10                           | 0.7               | 275              | 4.2                          | 8            |
|                       |                       | Woolworths           | Skyr                       | 9.6                          | <0.5              | 254              | 2.9                          | 9*           |
|                       |                       | Liddells             | Lactose free - plain       | 4.5                          | 2.9               | 354              | 9                            | 10           |
|                       | Drinkable             | Purejoy              | Original                   | 3.7                          | 2.4               | 302              | 7.7                          | 11#          |
|                       |                       | Yili Group           | Ambpoerial                 |                              |                   |                  |                              | 12*          |
|                       |                       | Farmers Union        | Greek style - Pouch        | 5.2                          | 3.3               | 314              | 6.1                          | 13           |
|                       |                       | The collective dairy | Kefir 13                   | 3.7                          | 2                 | 225              | 3.8                          | 14*          |
|                       |                       | Yoplait              | Petit Miam - Vanilla       | 3.4                          | 2.3               | 305              | 7.6                          | 15*          |
|                       | Chunks/ Bars          | Go Natural           | Berry Frugo's              | 2.2                          | 25.4              | 2120             | 64.2                         | 16           |
| Additives             | Flavored/ with Fruits | Danone               | Activia -Vanilla           | 4.9                          | 3.8               | 329              | 5.1                          | 17           |
|                       |                       | Dairy Farmers        | Thick & creamy - Vanilla   | 3.7                          | 6.3               | 525              | 12.9                         | 18*          |
|                       |                       | Gippsland            | Blueberry                  | 5.9                          | 5.7               | 607              | 15.9                         | 19*#         |
|                       |                       | Vaalia               | my first yogurt - vanilla  | 4.7                          | 2.8               | 330              | 7.3                          | 20*          |
|                       | Crunchies             | Chobani              | Fit - Vanilla cookie crush | 9.7                          | 1.2               | 386              | 2.9                          | 21*#         |
|                       | Grains                | Chobani              | Oats - Blueberry           | 7.3                          | 0.6               | 363              | 9.4                          | 22           |
|                       | High protein          | Danone               | YoPro+ (15 g) - vanilla    | 9.5                          | 0.3               | 243              | 3.2                          | 23*          |
| Plant-based           | Coconut               | Cocobella            | Coconut Yoghurt            | 0.9                          | 9.7               | 541              | 2                            | 24           |
|                       |                       | Nakula               | Unsweetened                | 0.7                          | 11                | 501              | 1                            | 25*#         |
|                       | Almond                | Impressed            | Vanilla flavor             | 1.4                          | 4.1               | 381              | 5                            | 26*          |
|                       | Soy                   | Soy Life             | Soy yogurt                 | 3.3                          | 0.7               | 330              | 10.1                         | 27           |
|                       |                       | Kingland             | Soy yogurt                 | 4.9                          | 3.9               | 285              | 1.7                          | 28*#         |

\*Yogurt products were subsequently selected as the 16 samples for untrained consumer panels.

#Yogurt products selected for further quantitative sensory, microstructural, and rheological analyses (as mentioned in Table 1).

**Table S2.** Random list of ‘emotions’ and ‘sensory attributes’ presented to the consumers in focus group discussions

| Mouthfeel          | Texture         | Flavor/ Aroma      | Emotion terms |             |
|--------------------|-----------------|--------------------|---------------|-------------|
| inclusions         | grainy          | acidic             | addictive     | joyful      |
| creamy             | firm            | tangy              | adult         | light       |
| dessert/ ice cream | thin            | sour               | adventurous   | luxury      |
| pleasing/ luscious | thick           | salty              | aggressive    | mellow      |
| artificial         | creamy          | milky              | arrogant      | mild        |
| runny              | cheesy          | not milky          | artificial    | modern      |
| thick              | mayo            | neutral            | aspirational  | nasty       |
| light              | lumpy           | delicate           | basic         | natural     |
| clean              | bad/ low        | light              | boring        | neutral     |
| good               | medium          | fruity             | brave         | nostalgic   |
| smooth             | good/ high      | very sweet         | candid        | ordinary    |
| not smooth         | strong contrast | sweet              | charming      | outgoing    |
| not natural        | oily            | slight sweet       | cheap         | outrageous  |
| lacking            | fatty           | not sweet          | cheeky        | premium     |
| powdery            | soft            | low on flavor      | cheerful      | pretentious |
| frothy             | smooth          | sugar aroma        | cheese-cake   | pure        |
| standard           | not smooth      | mild               | child-like    | quality     |
| unique             | crumbly         | strong             | clean         | quiet       |
| inconsistent       | gel             | no yoghurt taste   | common        | quirky      |
| not well mixed     | fluid           | savory             | confident     | reckless    |
| watery             | watery          | clean              | confused      | refreshing  |
| oily               | crunchy         | bland              | conservative  | relaxed     |
| lumpy              | powdery         | complex            | crazy         | rich        |
| grainy             | sticks to mouth | balanced           | creative      | satisfying  |
| chalky             | drinking type   | not balanced       | curious       | silly       |
|                    | whipped         | vinegary           | deceitful     | sincere     |
|                    | light           | lemony             | delicate      | sociable    |
|                    | heavy           | minty              | dependable    | sour power  |
|                    |                 | fatty              | disappointing | special     |
|                    |                 | makes mouth water  | easy-going    | specific    |
|                    |                 | creamy after-taste | energetic     | stimulating |
|                    |                 | oily after-taste   | exciting      | subtle      |
|                    |                 | after-taste        | feminine      | surprising  |
|                    |                 | sweet after-taste  | formal        | traditional |
|                    |                 | oily after-taste   | guilt-free    | trusted     |
|                    |                 | after-taste        | handmade      | unique      |
|                    |                 | sweet after-taste  | healthy       | uplifting   |
|                    |                 |                    | honest        | vegan       |
|                    |                 |                    | imaginative   | wild        |
|                    |                 |                    | indifferent   | wrong       |
|                    |                 |                    | indulgent     | youthful    |
|                    |                 |                    | interesting   |             |

**Table S3.** Demographic characteristics of the consumers (n = 117)

| Characteristics                     | Category               | Number of Consumers |
|-------------------------------------|------------------------|---------------------|
| <b>Gender</b>                       | Female                 | 75                  |
|                                     | Male                   | 42                  |
| <b>Age</b>                          | 20-29 years            | 51                  |
|                                     | 30-39 years            | 36                  |
|                                     | >40 years              | 30                  |
| <b>Ethnicity</b>                    | Western                | 44                  |
|                                     | Asian                  | 73                  |
| <b>Diet</b>                         | Vegetarian             | 20                  |
|                                     | Not on a specific diet | 107                 |
| <b>Yogurt Consumption Frequency</b> | Daily                  | 27                  |
|                                     | 2-3 times a week       | 37                  |
|                                     | Weekly                 | 33                  |
|                                     | Monthly                | 20                  |

**Table S4.** Factor loadings for multi-factor analysis for a combination of liking, product attributes, emotions, composition and texture variables

| <b>Variables</b>                   | <b>F1 (PC1)</b> | <b>F2 (PC2)</b> |
|------------------------------------|-----------------|-----------------|
| <b>Overall Liking</b>              | -0.970          | -0.047          |
| <b>Gel firmness</b>                | -0.502          | -0.649          |
| <b>Consistency coefficient (k)</b> | -0.524          | -0.647          |
| <b>Good Texture</b>                | -0.060          | 0.990           |
| <b>Bad Texture</b>                 | -0.250          | -0.074          |
| <b>Creamy</b>                      | 1.298           | -0.488          |
| <b>Smooth</b>                      | -0.079          | -0.101          |
| <b>Light</b>                       | -0.125          | 0.033           |
| <b>Cheerful</b>                    | -0.039          | 0.457           |
| <b>Neutral</b>                     | -0.741          | -0.184          |
| <b>Nasty</b>                       | -0.087          | 0.328           |
| <b>Trusted</b>                     | 1.170           | -0.417          |
| <b>Indifferent</b>                 | -0.566          | 0.034           |
| <b>Artificial</b>                  | 0.236           | 0.280           |
| <b>Protein</b>                     | 0.173           | 0.132           |
| <b>Fat</b>                         | -0.390          | -0.784          |
| <b>Calories</b>                    | 0.492           | 0.488           |
| <b>Sugars</b>                      | 0.749           | -0.266          |
